# Supplementary material for: Fetal Growth Restriction: Comparison of Biometric Parameters
Source: MDPI journal article supplement (doi:10.3390/jpm12071125), 2022-07-11
Supplement: s1 [file s1]

Table S1: Regression results for percentile plots of sonographic parameters. Model fit was performed for 10<sup>th</sup>, 50<sup>th</sup> and 90<sup>th</sup> percentile for each sonographic ratio fitted by: ratio ~ **a+b\*GA+c\*GA<sup>2</sup>+d\*GA<sup>3</sup>**. AC = abdominal circumference, BPD = biparietal diameter, CI = confidence interval, FL = femur length, HC = head circumference, pct = percentile, TCD = transcerebellar diameter.

| Ratio                            | Estimate | 95% CI              | <i>p</i> value |
|----------------------------------|----------|---------------------|----------------|
| <b>HC (10<sup>th</sup> pct)</b>  |          |                     |                |
| a                                | -5.5328  | -21.4299 – 10.3644  | 0.4951         |
| b                                | 2.1830   | 0.0809 – 4.2852     | 0.0418         |
| c                                | 0.4936   | 0.4037 – 0.5836     | <.0001         |
| d                                | -0.0086  | -0.0098 – -0.0073   | <.0001         |
| <b>HC (50<sup>th</sup> pct)</b>  |          |                     |                |
| a                                | -3.9716  | -17.7150 – 9.7719   | 0.5711         |
| b                                | 2.1841   | 0.4173 – 3.9508     | 0.0154         |
| c                                | 0.5179   | 0.4441 – 0.5917     | <.0001         |
| d                                | -0.0090  | -0.0100 – -0.0080   | <.0001         |
| <b>HC (90<sup>th</sup> pct)</b>  |          |                     |                |
| a                                | 13.2957  | -5.5018 – 32.0932   | 0.1656         |
| b                                | 0.3035   | -2.1751 – 2.7821    | 0.8103         |
| c                                | 0.6126   | 0.5066 – 0.7186     | <.0001         |
| d                                | -0.0102  | -0.0117 – -0.0088   | <.0001         |
| <b>BPD (10<sup>th</sup> pct)</b> |          |                     |                |
| a                                | 8.3921   | 2.5741 – 14.2102    | 0.0047         |
| b                                | -0.4590  | -1.2274 – 0.3093    | 0.2416         |
| c                                | 0.1721   | 0.1394 – 0.2048     | <.0001         |
| d                                | -0.0027  | -0.0032 – -0.0023   | <.0001         |
| <b>BPD (50<sup>th</sup> pct)</b> |          |                     |                |
| a                                | 2.2356   | -2.8324 – 7.3037    | 0.3872         |
| b                                | 0.3997   | -0.2703 – 1.0696    | 0.2423         |
| c                                | 0.1463   | 0.1175 – 0.1751     | <.0001         |
| d                                | -0.0024  | -0.0028 – -0.0021   | <.0001         |
| <b>BPD (90<sup>th</sup> pct)</b> |          |                     |                |
| a                                | 6.7349   | 0.7516 – 12.7182    | 0.0274         |
| b                                | -0.0910  | -0.8707 – 0.6888    | 0.8191         |
| c                                | 0.1743   | 0.1413 – 0.2073     | <.0001         |
| d                                | -0.0028  | -0.0033 – -0.0024   | <.0001         |
| <b>AC (10<sup>th</sup> pct)</b>  |          |                     |                |
| a                                | -69.0745 | -87.7419 – -50.4071 | <.0001         |
| b                                | 9.5145   | 7.0579 – 11.9711    | <.0001         |
| c                                | 0.0936   | -0.0110 – 0.1983    | 0.0794         |
| d                                | -0.0020  | -0.0034 – -0.0006   | 0.0061         |
| <b>AC (50<sup>th</sup> pct)</b>  |          |                     |                |
| a                                | -70.9656 | -84.3577 – -57.5735 | <.0001         |
| b                                | 10.2846  | 8.5417 – 12.0275    | <.0001         |
| c                                | 0.0727   | -0.0011 – 0.1465    | 0.0535         |
| d                                | -0.0016  | -0.0026 – -0.0006   | 0.0022         |
| <b>AC (90<sup>th</sup> pct)</b>  |          |                     |                |
| a                                | -46.3402 | -68.7357 – -23.9446 | <.0001         |
| b                                | 7.4990   | 4.5507 – 10.4472    | <.0001         |
| c                                | 0.2056   | 0.0804 – 0.3309     | 0.0013         |
| d                                | -0.0033  | -0.0050 – -0.0016   | 0.0002         |
| <b>FL (10<sup>th</sup> pct)</b>  |          |                     |                |

|                                     |          |                     |        |
|-------------------------------------|----------|---------------------|--------|
| a                                   | -39.8647 | -44.1893 – -35.5401 | <.0001 |
| b                                   | 4.2383   | 3.6761 – 4.8005     | <.0001 |
| c                                   | -0.0348  | -0.0583 – -0.0112   | 0.0038 |
| d                                   | 0.0000   | -0.0004 – 0.0003    | 0.8293 |
| <b>FL (50<sup>th</sup> pct)</b>     |          |                     |        |
| a                                   | -40.2490 | -43.2771 – -37,2210 | <.0001 |
| b                                   | 4.4077   | 4.0241 – 4.7912     | <.0001 |
| c                                   | -0.0385  | -0.0544 – -0.0227   | <.0001 |
| d                                   | 0.0000   | -0.0002 – 0.0002    | 0.8453 |
| <b>FL (90<sup>th</sup> pct)</b>     |          |                     |        |
| a                                   | -29.7584 | -33.4226 – -26.0942 | <.0001 |
| b                                   | 3.2440   | 2.7802 – 3.7078     | <.0001 |
| c                                   | 0.0114   | -0.0077 – 0.0305    | 0.2405 |
| d                                   | -0.0006  | -0.0009 – -0.0004   | <.0001 |
| <b>TCD (10<sup>th</sup> pct)</b>    |          |                     |        |
| a                                   | 16.3571  | 11.5841 – 21.1301   | <.0001 |
| b                                   | -1.5250  | -2.1720 – -0.8780   | <.0001 |
| c                                   | 0.1092   | 0.0809 – 0.1376     | <.0001 |
| d                                   | -0.0013  | -0.0017 – -0,0009   | <.0001 |
| <b>TCD (50<sup>th</sup> pct)</b>    |          |                     |        |
| a                                   | 17.1858  | 13.3614 – 21.0101   | <.0001 |
| b                                   | -1.4903  | -2.0216 – -0.9590   | <.0001 |
| c                                   | 0.1048   | 0.0809 – 0.1287     | <.0001 |
| d                                   | -0.0011  | -0.0014 – -0,0008   | <.0001 |
| <b>TCD (90<sup>th</sup> pct)</b>    |          |                     |        |
| a                                   | 18.3239  | 12.7680 – 23.8798   | <.0001 |
| b                                   | -1.4625  | -2.2075 – -0.7176   | <.0001 |
| c                                   | 0.1004   | 0.0680 – 0.1327     | <.0001 |
| d                                   | -0.0009  | -0.0014 – -0,0005   | <.0001 |
| <b>FL/AC (10<sup>th</sup> pct)</b>  |          |                     |        |
| a                                   | -0.1660  | -0.1934 – -0.1386   | <.0001 |
| b                                   | 0.0385   | 0.0352 – 0.0418     | <.0001 |
| c                                   | -0.0013  | -0.0014 – -0,0012   | <.0001 |
| d                                   | 0.0000   | 0.0000 – 0.0000     | <.0001 |
| <b>FL/AC (50<sup>th</sup> pct)</b>  |          |                     |        |
| a                                   | -0.1325  | -0.1544 – -0,1106   | <.0001 |
| b                                   | 0.0364   | 0.0337 – 0.0391     | <.0001 |
| c                                   | -0.0012  | -0.0013 – -0,0011   | <.0001 |
| d                                   | 0.0000   | 0.0000 – 0.0000     | <.0001 |
| <b>FL/AC (90<sup>th</sup> pct)</b>  |          |                     |        |
| a                                   | -0.0662  | -0.1013 – -0,0311   | 0.0002 |
| b                                   | 0.0308   | 0.0266 – 0.0351     | <.0001 |
| c                                   | -0.0010  | -0.0012 – -0,0008   | <.0001 |
| d                                   | 0.0000   | 0.0000 – 0.0000     | <.0001 |
| <b>TCD/AC (10<sup>th</sup> pct)</b> |          |                     |        |
| a                                   | 34.1176  | 31.3786 – 36.8566   | <.0001 |
| b                                   | -2.3949  | -2.7367 – -2.0530   | <.0001 |
| c                                   | 0.0853   | 0.0713 – 0.0993     | <.0001 |
| d                                   | -0.0010  | -0.0012 – -0.0008   | <.0001 |
| <b>TCD/AC (50<sup>th</sup> pct)</b> |          |                     |        |
| a                                   | 39.1917  | 37.5438 – 40.8396   | <.0001 |
| b                                   | -2.8566  | -3.0659 – -2.6473   | <.0001 |

|                                     |         |                   |        |
|-------------------------------------|---------|-------------------|--------|
| c                                   | 0.1018  | 0.0931 – 0.1104   | <.0001 |
| d                                   | -0.0011 | -0.0013 – -0.0010 | <.0001 |
| <b>TCD/AC (90<sup>th</sup> pct)</b> |         |                   |        |
| a                                   | 45.2301 | 42.3682 – 48.0919 | <.0001 |
| b                                   | -3.3964 | -3.7590 – -3.0337 | <.0001 |
| c                                   | 0.1200  | 0.1050 – 0.1350   | <.0001 |
| d                                   | -0.0013 | -0.0015 – -0.0011 | <.0001 |
| <b>HC/AC (10<sup>th</sup> pct)</b>  |         |                   |        |
| a                                   | 15.3218 | 14.1559 – 16.4878 | <.0001 |
| b                                   | -0.4693 | -0.6111 – -0.3276 | <.0001 |
| c                                   | 0.0172  | 0.0116 – 0.0228   | <.0001 |
| d                                   | -0.0002 | -0.0003 – -0.0002 | <.0001 |
| <b>HC/AC (50<sup>th</sup> pct)</b>  |         |                   |        |
| a                                   | 18.2726 | 17.1183 – 19.4270 | <.0001 |
| b                                   | -0.7345 | -0.8759 – -0.5932 | <.0001 |
| c                                   | 0.0272  | 0.0216 – 0.0328   | <.0001 |
| d                                   | -0.0004 | -0.0004 – -0.0003 | <.0001 |
| <b>HC/AC (90<sup>th</sup> pct)</b>  |         |                   |        |
| a                                   | 18.5081 | 16.8963 – 20.1200 | <.0001 |
| b                                   | -0.6491 | -0.8422 – -0.4559 | <.0001 |
| c                                   | 0.0231  | 0.0156 – 0.0305   | <.0001 |
| d                                   | -0.0003 | -0.0004 – -0.0002 | <.0001 |

Table S2: Regression results for percentile plots of sonographic parameters. Model fit was performed for 3<sup>th</sup> and 97<sup>th</sup> percentile for each sonographic ratio fitted by:  $\text{ratio} \sim a + b \cdot \text{GA} + c \cdot \text{GA}^2 + d \cdot \text{GA}^3$ . AC = abdominal circumference, BPD = biparietal diameter, CI = confidence interval, FL = femur length, HC = head circumference, pct=percentile, TCD = transcerebellar diameter.

| ratio                            | Estimate | 95% CI               | <i>p</i> value |
|----------------------------------|----------|----------------------|----------------|
| <b>HC (3<sup>th</sup> pct)</b>   |          |                      |                |
| a                                | -10.2006 | -33.4466 – 13.0455   | 0.3897         |
| b                                | 2.5757   | -0.4888 – 5.6403     | 0.0995         |
| c                                | 0.4719   | 0.3415 – 0.6024      | <.0001         |
| d                                | -0.0083  | -0.0101 – -0.0065    | <.0001         |
| <b>HC (97<sup>th</sup> pct)</b>  |          |                      |                |
| a                                | 16.2585  | -10.0805 – 42.5975   | 0.2263         |
| b                                | 0.1701   | -3.3262 – 3.6665     | 0.9240         |
| c                                | 0.6214   | 0.4706 – 0.7722      | <.0001         |
| d                                | -0.0103  | -0.0124 – -0.0082    | <.0001         |
| <b>BPD (3<sup>th</sup> pct)</b>  |          |                      |                |
| a                                | 13.4294  | 4.4180 – 22.4407     | 0.0035         |
| b                                | -1.1306  | -2.2904 – 0.0292     | 0.0561         |
| c                                | 0.1943   | 0.1461 – 0.2425      | <.0001         |
| d                                | -0.0030  | -0.0036 – -0.0023    | <.0001         |
| <b>BPD (97<sup>th</sup> pct)</b> |          |                      |                |
| a                                | 12.7560  | 3.4725 – 22.0395     | 0.0071         |
| b                                | -0.7646  | -1.9337 – 0.4046     | 0.1999         |
| c                                | 0.2035   | 0.1560 – 0.2511      | <.0001         |
| d                                | -0.0032  | -0.0038 – -0.0026    | <.0001         |
| <b>AC (3<sup>th</sup> pct)</b>   |          |                      |                |
| a                                | -63.2831 | -88.4957 – -38.0704  | <.0001         |
| b                                | 8.6451   | 5.3611 – 11.9292     | <.0001         |
| c                                | 0.1172   | -0.0197 – 0.2542     | 0.0933         |
| d                                | -0.0023  | -0.0041 – -0.0004    | 0.0147         |
| <b>AC (97<sup>th</sup> pct)</b>  |          |                      |                |
| a                                | -33.1537 | -63.8501 – -2.4573   | 0.0343         |
| b                                | 5.9026   | 2.0297 – 9.7755      | 0.0028         |
| c                                | 0.2862   | 0.1275 – 0.4448      | 0.0004         |
| d                                | -0.0044  | -0.0065 – -0.0023    | <.0001         |
| <b>FL (3<sup>th</sup> pct)</b>   |          |                      |                |
| a                                | -37.3809 | -42.98931 – -31.7686 | <.0001         |
| b                                | 3.9113   | 3.2008 – 4.6218      | <.0001         |
| c                                | -0.0243  | -0.0536 – 0.0050     | 0.1035         |
| d                                | -0.0002  | -0.0005 – 0.0002     | 0.4323         |
| <b>FL (97<sup>th</sup> pct)</b>  |          |                      |                |
| a                                | -25.7335 | -32.4664 – -19.0006  | <.0001         |
| b                                | 2.7815   | 1.9403 – 3.6227      | <.0001         |
| c                                | 0.0329   | -0.0013 – 0.0670     | 0.0593         |
| d                                | -0.0009  | -0.0014 – -0.0005    | <.0001         |
| <b>TCD (3<sup>th</sup> pct)</b>  |          |                      |                |
| a                                | 7.4550   | 0.2833 – 14.6268     | 0.0416         |
| b                                | -0.4535  | -1.4037 – 0.4968     | 0.3496         |
| c                                | 0.0666   | 0.0259 – 0.1073      | 0.0013         |
| d                                | -0.0008  | -0.0014 – -0.0002    | 0.0049         |
| <b>TCD (97<sup>th</sup> pct)</b> |          |                      |                |

|                                     |         |                   |        |
|-------------------------------------|---------|-------------------|--------|
| a                                   | 20.8028 | 6.7502 – 34.8553  | 0.0037 |
| b                                   | -1.7493 | -3.7387 – 0.2400  | 0.0848 |
| c                                   | 0.1122  | 0.0209 – 0.2035   | 0.0160 |
| d                                   | -0.0010 | -0.0024 – 0.0003  | 0.1384 |
| <b>FL/AC (3<sup>th</sup> pct)</b>   |         |                   |        |
| a                                   | -0.1938 | -0.2343 – -0.1532 | <.0001 |
| b                                   | 0.0412  | 0.0362 – 0.0463   | <.0001 |
| c                                   | -0.0014 | -0.0016 – -0.0012 | <.0001 |
| d                                   | 0.0000  | 0.0000 – 0.0000   | <.0001 |
| <b>FL/AC (97<sup>th</sup> pct)</b>  |         |                   |        |
| a                                   | -0.0506 | -0.1246 – 0.0234  | 0.1804 |
| b                                   | 0.0299  | 0.0208 – 0.0389   | <.0001 |
| c                                   | -0.0010 | -0.0013 – -0.0006 | <.0001 |
| d                                   | 0.0000  | 0.0000 – 0.0000   | <.0001 |
| <b>TCD/AC (3<sup>th</sup> pct)</b>  |         |                   |        |
| a                                   | 31.9001 | 28.1809 – 35.6192 | <.0001 |
| b                                   | -2.2270 | -2.6940 – -1.7600 | <.0001 |
| c                                   | 0.0810  | 0.0618 – 0.1002   | <.0001 |
| d                                   | -0.0010 | -0.0012 – -0.0007 | <.0001 |
| <b>TCD/AC (97<sup>th</sup> pct)</b> |         |                   |        |
| a                                   | 48.6127 | 43.1549 – 54.0704 | <.0001 |
| b                                   | -3.7614 | -4.4600 – -3.0629 | <.0001 |
| c                                   | 0.1347  | 0.1055 – 0.1638   | <.0001 |
| d                                   | -0.0015 | -0.0019 – -0.0011 | <.0001 |
| <b>HC/AC (3<sup>th</sup> pct)</b>   |         |                   |        |
| a                                   | 12.9014 | 11.3303 – 14.4725 | <.0001 |
| b                                   | -0.2144 | -0.4006 – -0.0281 | 0.0241 |
| c                                   | 0.0071  | -0.0001 – 0.0143  | 0.0522 |
| d                                   | -0.0001 | -0.0002 – 0.0000  | 0.0185 |
| <b>HC/AC (97<sup>th</sup> pct)</b>  |         |                   |        |
| a                                   | 20.7330 | 18.3564 – 23.1095 | <.0001 |
| b                                   | -0.8811 | -1.1565 – -0.6056 | <.0001 |
| c                                   | 0.0325  | 0.0222 – 0.0429   | <.0001 |
| d                                   | -0.0004 | -0.0006 – -0.0003 | <.0001 |

Table S3: Results of logistic regression analysis for the gestational-age depended association between sonographic parameters and small gestational age. Model fit was performed for each parameter separately, including gestational age, sonographic parameter and an interaction term between gestational age and parameter. AC = abdominal circumference, BPD = biparietal diameter, CI = confidence interval, FL = femur length, HC = head circumference, TCD = transcerebellar diameter.

| Sonographic parameter | Gestational age in weeks | Odds ratio | 95% CI        | <i>p</i> value |
|-----------------------|--------------------------|------------|---------------|----------------|
| <b>HC</b>             | 14+0 – 18+6              | 0.977      | 0.963 – 0.991 | 0.0013         |
|                       | 19+0 – 23+6              | 0.965      | 0.957 – 0.974 | <.0001         |
|                       | 24+0 – 28+6              | 0.952      | 0.944 – 0.961 | <.0001         |
|                       | 29+0 – 33+6              | 0.931      | 0.920 – 0.941 | <.0001         |
|                       | 34+0 – 38+6              | 0.888      | 0.868 – 0.908 | <.0001         |
|                       | ≥39+0                    | 0.897      | 0.802 – 1.004 | 0.0595         |
|                       |                          |            |               |                |
| <b>BPD</b>            | 14+0 – 18+6              | 0.933      | 0.888 – 0.979 | 0.0052         |
|                       | 19+0 – 23+6              | 0.893      | 0.869 – 0.917 | <.0001         |
|                       | 24+0 – 28+6              | 0.858      | 0.833 – 0.883 | <.0001         |
|                       | 29+0 – 33+6              | 0.801      | 0.772 – 0.831 | <.0001         |
|                       | 34+0 – 38+6              | 0.707      | 0.662 – 0.754 | <.0001         |
|                       | ≥39+0                    | 0.709      | 0.492 – 1.022 | 0.0649         |
|                       |                          |            |               |                |
| <b>AC</b>             | 14+0 – 18+6              | 0.968      | 0.953 – 0.983 | <.0001         |
|                       | 19+0 – 23+6              | 0.935      | 0.926 – 0.943 | <.0001         |
|                       | 24+0 – 28+6              | 0.927      | 0.916 – 0.938 | <.0001         |
|                       | 29+0 – 33+6              | 0.920      | 0.909 – 0.931 | <.0001         |
|                       | 34+0 – 38+6              | 0.885      | 0.866 – 0.904 | <.0001         |
|                       | ≥39+0                    | 0.849      | 0.692 – 1.042 | 0.1167         |
|                       |                          |            |               |                |
| <b>FL</b>             | 14+0 – 18+6              | 0.884      | 0.835 – 0.936 | <.0001         |
|                       | 19+0 – 23+6              | 0.805      | 0.776 – 0.834 | <.0001         |
|                       | 24+0 – 28+6              | 0.773      | 0.740 – 0.807 | <.0001         |
|                       | 29+0 – 33+6              | 0.735      | 0.701 – 0.771 | <.0001         |
|                       | 34+0 – 38+6              | 0.700      | 0.651 – 0.753 | <.0001         |
|                       | ≥39+0                    | 0.314      | 0.091 – 1.087 | 0.0675         |
|                       |                          |            |               |                |
| <b>TCD</b>            | 14+0 – 18+6              | 0.873      | 0.772 – 0.986 | 0.0284         |
|                       | 19+0 – 23+6              | 0.861      | 0.811 – 0.913 | <.0001         |
|                       | 24+0 – 28+6              | 0.854      | 0.811 – 0.898 | <.0001         |
|                       | 29+0 – 33+6              | 0.920      | 0.886 – 0.955 | <.0001         |
|                       | 34+0 – 38+6              | 0.891      | 0.850 – 0.933 | <.0001         |
|                       | ≥39+0                    | 0.806      | 0.606 – 1.073 | 0.1401         |
|                       |                          |            |               |                |
| <b>FL/AC</b>          | 14+0 – 18+6              | 0.839      | 0.739 – 0.953 | 0.0068         |
|                       | 19+0 – 23+6              | 1.053      | 0.979 – 1.133 | 0.1639         |
|                       | 24+0 – 28+6              | 1.247      | 1.122 – 1.385 | <.0001         |
|                       | 29+0 – 33+6              | 1.396      | 1.255 – 1.553 | <.0001         |
|                       | 34+0 – 38+6              | 1.977      | 1.675 – 2.333 | <.0001         |
|                       | ≥39+0                    | 2.973      | 0.886 – 9.973 | 0.0776         |
|                       |                          |            |               |                |
| <b>TCD/AC</b>         | 14+0 – 18+6              | 1.668      | 1.72 – 2.028  | <.0001         |

|              |             |       |               |        |
|--------------|-------------|-------|---------------|--------|
|              | 19+0 – 23+6 | 2.249 | 1.999 – 2.531 | <.0001 |
|              | 24+0 – 28+6 | 2.421 | 2.065 – 2.838 | <.0001 |
|              | 29+0 – 33+6 | 1.962 | 1.732 – 2.224 | <.0001 |
|              | 34+0 – 38+6 | 1.600 | 1.394 – 1.836 | <.0001 |
|              | >=39+0      | 1.252 | 0.713 – 2.199 | 0.4342 |
| <b>HC/AC</b> | 14+0 – 18+6 | 1.069 | 1.033 – 1.106 | 0.0001 |
|              | 19+0 – 23+6 | 1.125 | 1.105 – 1.144 | <.0001 |
|              | 24+0 – 28+6 | 1.171 | 1.139 – 1.203 | <.0001 |
|              | 29+0 – 33+6 | 1.155 | 1.125 – 1.185 | <.0001 |
|              | 34+0 – 38+6 | 1.172 | 1.129 – 1.215 | <.0001 |
|              | >=39+0      | 1.184 | 0.972 – 1.443 | 0.0941 |

Table S4: Results of logistic regression analysis for the gestational-age depended association between sonographic parameters and fetal growth restriction. Model fit was performed for each parameter separately, including gestational age, sonographic parameter and an interaction term between gestational age and parameter. AC = abdominal circumference, BPD = biparietal diameter, CI = confidence interval, FL = femur length, HC = head circumference, TCD = transcerebellar diameter.

| Sonographic parameter | Gestational age in weeks | Odds ratio | 95% CI        | <i>p</i> value |
|-----------------------|--------------------------|------------|---------------|----------------|
| <b>HC</b>             | 14+0 – 18+6              | 0.960      | 0.915 – 1.007 | 0.0912         |
|                       | 19+0 – 23+6              | 0.956      | 0.935 – 0.977 | <.0001         |
|                       | 24+0 – 28+6              | 0.921      | 0.904 – 0.938 | <.0001         |
|                       | 29+0 – 33+6              | 0.908      | 0.890 – 0.926 | <.0001         |
|                       | 34+0 – 38+6              | 0.852      | 0.818 – 0.887 | <.0001         |
|                       | ≥39+0                    | 0.679      | 0.091 – 5.061 | 0.7057         |
|                       |                          |            |               |                |
| <b>BPD</b>            | 14+0 – 18+6              | 0.906      | 0.774 – 1.060 | 0.2172         |
|                       | 19+0 – 23+6              | 0.837      | 0.778 – 0.901 | <.0001         |
|                       | 24+0 – 28+6              | 0.775      | 0.732 – 0.821 | <.0001         |
|                       | 29+0 – 33+6              | 0.757      | 0.713 – 0.804 | <.0001         |
|                       | 34+0 – 38+6              | 0.626      | 0.558 – 0.703 | <.0001         |
|                       | ≥39+0                    | 0.038      | NA            | 0.8967         |
|                       |                          |            |               |                |
| <b>AC</b>             | 14+0 – 18+6              | 0.951      | 0.902 – 1.002 | 0.0614         |
|                       | 19+0 – 23+6              | 0.893      | 0.869 – 0.918 | <.0001         |
|                       | 24+0 – 28+6              | 0.886      | 0.864 – 0.909 | <.0001         |
|                       | 29+0 – 33+6              | 0.890      | 0.869 – 0.911 | <.0001         |
|                       | 34+0 – 38+6              | 0.837      | 0.798 – 0.878 | <.0001         |
|                       | ≥39+0                    | 0.684      | NA            | 0.9619         |
|                       |                          |            |               |                |
| <b>FL</b>             | 14+0 – 18+6              | 0.822      | 0.676 – 0.999 | 0.0488         |
|                       | 19+0 – 23+6              | 0.694      | 0.625 – 0.770 | <.0001         |
|                       | 24+0 – 28+6              | 0.663      | 0.608 – 0.724 | <.0001         |
|                       | 29+0 – 33+6              | 0.654      | 0.601 – 0.713 | <.0001         |
|                       | 34+0 – 38+6              | 0.579      | 0.503 – 0.666 | <.0001         |
|                       | ≥39+0                    | 0.005      | NA            | 0.8686         |
|                       |                          |            |               |                |
| <b>TCD</b>            | 14+0 – 18+6              | 0.865      | 0.595 – 1.259 | 0.4494         |
|                       | 19+0 – 23+6              | 0.906      | 0.784 – 1.047 | 0.1816         |
|                       | 24+0 – 28+6              | 0.756      | 0.690 – 0.828 | <.0001         |
|                       | 29+0 – 33+6              | 0.908      | 0.854 – 0.966 | 0.0023         |
|                       | 34+0 – 38+6              | 0.874      | 0.812 – 0.940 | 0.0003         |
|                       | ≥39+0                    | 1.133      | 0.632 – 2.030 | 0.6755         |
|                       |                          |            |               |                |
| <b>FL/AC</b>          | 14+0 – 18+6              | 0.753      | 0.506 – 1.121 | 0.1625         |
|                       | 19+0 – 23+6              | 1.052      | 0.876 – 1.265 | 0.5853         |
|                       | 24+0 – 28+6              | 1.231      | 1.036 – 1.463 | 0.0183         |
|                       | 29+0 – 33+6              | 1.361      | 1.149 – 1.612 | 0.0004         |
|                       | 34+0 – 38+6              | 2.209      | 1.736 – 2.811 | <.0001         |
|                       | ≥39+0                    | NA         | NA            | 0.9151         |
|                       |                          |            |               |                |
| <b>TCD/AC</b>         | 14+0 – 18+6              | 2.165      | 1.271 – 3.686 | 0.0045         |



|              |             |       |               |        |
|--------------|-------------|-------|---------------|--------|
|              | 19+0 – 23+6 | 3.327 | 2.581 – 4.288 | <.0001 |
|              | 24+0 – 28+6 | 3.173 | 2.474 – 4.070 | <.0001 |
|              | 29+0 – 33+6 | 2.511 | 2.053 – 3.072 | <.0001 |
|              | 34+0 – 38+6 | 2.000 | 1.612 – 2.482 | <.0001 |
|              | >=39+0      | NA    | NA            | 0.9533 |
| <b>HC/AC</b> | 14+0 – 18+6 | 1.068 | 0.965 – 1.183 | 0.2048 |
|              | 19+0 – 23+6 | 1.193 | 1.147 – 1.241 | <.0001 |
|              | 24+0 – 28+6 | 1.236 | 1.182 – 1.293 | <.0001 |
|              | 29+0 – 33+6 | 1.192 | 1.145 – 1.241 | <.0001 |
|              | 34+0 – 38+6 | 1.223 | 1.155 – 1.295 | <.0001 |
|              | >=39+0      | 5.035 | NA            | 0.9379 |

Table S5: Evaluation of gestational age-dependent cut-off values, 10th percentile (SGA). AC = abdominal circumference, BPD = biparietal diameter, FL = femur length, GA = Gestational age, HC = head circumference, TCD = transcerebellar diameter.

| Parameter      | Sensitivity | Specificity | Positive predictive value | Negative predictive value | Youden Index (J) |
|----------------|-------------|-------------|---------------------------|---------------------------|------------------|
| <b>HC</b>      |             |             |                           |                           |                  |
| <b>Total</b>   | 0.55        | 0.91        | 0.43                      | 0.94                      | 0.46             |
| GA: 14+0– 18+6 | 0.35        | 0.90        | 0.18                      | 0.95                      | 0.25             |
| 19+0– 23+6     | 0.44        | 0.91        | 0.30                      | 0.95                      | 0.35             |
| 24+0– 28+6     | 0.65        | 0.90        | 0.56                      | 0.92                      | 0.55             |
| 29+0– 33+6     | 0.65        | 0.93        | 0.69                      | 0.92                      | 0.58             |
| 34+0– 38+6     | 0.64        | 0.90        | 0.65                      | 0.90                      | 0.54             |
| <b>BPD</b>     |             |             |                           |                           |                  |
| <b>Total</b>   | 0.51        | 0.88        | 0.35                      | 0.93                      | 0.39             |
| GA: 14+0– 18+6 | 0.28        | 0.88        | 0.14                      | 0.95                      | 0.16             |
| 19+0– 23+6     | 0.36        | 0.88        | 0.21                      | 0.94                      | 0.24             |
| 24+0– 28+6     | 0.64        | 0.87        | 0.51                      | 0.92                      | 0.51             |
| 29+0– 33+6     | 0.65        | 0.87        | 0.55                      | 0.91                      | 0.52             |
| 34+0– 38+6     | 0.67        | 0.86        | 0.57                      | 0.90                      | 0.53             |
| <b>AC</b>      |             |             |                           |                           |                  |
| <b>Total</b>   | 0.74        | 0.90        | 0.48                      | 0.96                      | 0.64             |
| GA: 14+0– 18+6 | 0.48        | 0.89        | 0.22                      | 0.96                      | 0.37             |
| 19+0– 23+6     | 0.65        | 0.90        | 0.37                      | 0.97                      | 0.55             |
| 24+0– 28+6     | 0.82        | 0.90        | 0.63                      | 0.96                      | 0.72             |
| 29+0– 33+6     | 0.83        | 0.89        | 0.65                      | 0.96                      | 0.72             |
| 34+0– 38+6     | 0.90        | 0.91        | 0.74                      | 0.97                      | 0.81             |
| <b>FL</b>      |             |             |                           |                           |                  |
| <b>Total</b>   | 0.65        | 0.90        | 0.44                      | 0.95                      | 0.55             |
| GA: 14+0– 18+6 | 0.56        | 0.89        | 0.24                      | 0.97                      | 0.45             |
| 19+0– 23+6     | 0.59        | 0.90        | 0.34                      | 0.96                      | 0.49             |
| 24+0– 28+6     | 0.72        | 0.88        | 0.56                      | 0.94                      | 0.60             |
| 29+0– 33+6     | 0.70        | 0.90        | 0.62                      | 0.93                      | 0.60             |
| 34+0– 38+6     | 0.67        | 0.89        | 0.62                      | 0.91                      | 0.56             |
| <b>TCD</b>     |             |             |                           |                           |                  |
| <b>Total</b>   | 0.24        | 0.91        | 0.25                      | 0.90                      | 0.15             |
| GA: 14+0– 18+6 | 0.19        | 0.92        | 0.13                      | 0.94                      | 0.11             |
| 19+0– 23+6     | 0.24        | 0.90        | 0.18                      | 0.93                      | 0.14             |
| 24+0– 28+6     | 0.30        | 0.91        | 0.39                      | 0.86                      | 0.21             |
| 29+0– 33+6     | 0.20        | 0.92        | 0.39                      | 0.83                      | 0.12             |
| 34+0– 38+6     | 0.25        | 0.91        | 0.44                      | 0.81                      | 0.16             |
| <b>FL/AC</b>   |             |             |                           |                           |                  |
| <b>Total</b>   | 0.40        | 0.78        | 0.19                      | 0.91                      | 0.18             |
| GA: 14+0– 18+6 | 0.05        | 0.86        | 0.02                      | 0.93                      | 0.09             |
| 19+0– 23+6     | 0.21        | 0.84        | 0.10                      | 0.92                      | 0.05             |
| 24+0– 28+6     | 0.32        | 0.79        | 0.24                      | 0.85                      | 0.11             |
| 29+0– 33+6     | 0.60        | 0.58        | 0.26                      | 0.86                      | 0.18             |
| 34+0– 38+6     | 0.88        | 0.40        | 0.29                      | 0.92                      | 0.28             |
| <b>TCD/AC</b>  |             |             |                           |                           |                  |
| <b>Total</b>   | 0.23        | 0.94        | 0.33                      | 0.90                      | 0.17             |

|                |      |      |      |      |      |
|----------------|------|------|------|------|------|
| GA: 14+0– 18+6 | 0.19 | 0.92 | 0.13 | 0.94 | 0.11 |
| 19+0– 23+6     | 0.22 | 0.94 | 0.24 | 0.93 | 0.16 |
| 24+0– 28+6     | 0.31 | 0.95 | 0.54 | 0.87 | 0.26 |
| 29+0– 33+6     | 0.24 | 0.97 | 0.64 | 0.84 | 0.21 |
| 34+0– 38+6     | 0.13 | 0.96 | 0.50 | 0.80 | 0.09 |
| <b>HC/AC</b>   |      |      |      |      |      |
| <b>Total</b>   | 0.31 | 0.91 | 0.31 | 0.91 | 0.22 |
| GA: 14+0– 18+6 | 0.19 | 0.90 | 0.11 | 0.94 | 0.09 |
| 19+0– 23+6     | 0.30 | 0.91 | 0.23 | 0.94 | 0.21 |
| 24+0– 28+6     | 0.36 | 0.91 | 0.44 | 0.87 | 0.27 |
| 29+0– 33+6     | 0.34 | 0.91 | 0.48 | 0.85 | 0.25 |
| 34+0– 38+6     | 0.27 | 0.94 | 0.55 | 0.82 | 0.21 |

Table S6: Evaluation of gestational age-dependent cut-off values, 3rd percentile (FGR). AC = abdominal circumference, BPD = biparietal diameter, FL = femur length, GA = Gestational age, HC = head circumference, TCD = transcerebellar diameter.

| Parameter     | Sensitivity | Specificity | Positive predictive value | Negative predictive value | Youden Index (J) |
|---------------|-------------|-------------|---------------------------|---------------------------|------------------|
| <b>HC</b>     |             |             |                           |                           |                  |
| Total         | 0.64        | 0.97        | 0.39                      | 0.99                      | 0.61             |
| GA: 14+0–18+6 | 0.63        | 0.96        | 0.10                      | 1.00                      | 0.59             |
| 19+0–23+6     | 0.53        | 0.97        | 0.19                      | 0.99                      | 0.50             |
| 24+0–28+6     | 0.77        | 0.96        | 0.56                      | 0.98                      | 0.73             |
| 29+0–33+6     | 0.60        | 0.97        | 0.63                      | 0.97                      | 0.57             |
| 34+0–38+6     | 0.67        | 0.97        | 0.68                      | 0.97                      | 0.64             |
| <b>BPD</b>    |             |             |                           |                           |                  |
| Total         | 0.45        | 0.98        | 0.40                      | 0.98                      | 0.43             |
| GA: 14+0–18+6 | 0.38        | 0.97        | 0.08                      | 1.00                      | 0.35             |
| 19+0–23+6     | 0.37        | 0.98        | 0.19                      | 0.99                      | 0.35             |
| 24+0–28+6     | 0.59        | 0.97        | 0.58                      | 0.97                      | 0.56             |
| 29+0–33+6     | 0.41        | 0.99        | 0.78                      | 0.96                      | 0.40             |
| 34+0–38+6     | 0.42        | 0.98        | 0.71                      | 0.95                      | 0.40             |
| <b>AC</b>     |             |             |                           |                           |                  |
| Total         | 0.87        | 0.97        | 0.51                      | 1.00                      | 0.84             |
| GA: 14+0–18+6 | 0.63        | 0.97        | 0.12                      | 1.00                      | 0.60             |
| 19+0–23+6     | 0.80        | 0.97        | 0.28                      | 1.00                      | 0.77             |
| 24+0–28+6     | 0.91        | 0.98        | 0.74                      | 0.99                      | 0.89             |
| 29+0–33+6     | 0.87        | 0.97        | 0.72                      | 0.99                      | 0.84             |
| 34+0–38+6     | 0.98        | 0.98        | 0.82                      | 1.00                      | 0.96             |
| <b>FL</b>     |             |             |                           |                           |                  |
| Total         | 0.62        | 0.99        | 0.58                      | 0.99                      | 0.61             |
| GA: 14+0–18+6 | 0.88        | 0.97        | 0.18                      | 1.00                      | 0.85             |
| 19+0–23+6     | 0.71        | 0.97        | 0.41                      | 1.00                      | 0.68             |
| 24+0–28+6     | 0.72        | 0.99        | 0.78                      | 0.98                      | 0.71             |
| 29+0–33+6     | 0.59        | 0.99        | 0.86                      | 0.97                      | 0.58             |
| 34+0–38+6     | 0.40        | 1.00        | 1.00                      | 0.94                      | 0.40             |
| <b>TCD</b>    |             |             |                           |                           |                  |
| Total         | 0.20        | 0.97        | 0.17                      | 0.98                      | 0.17             |
| GA: 14+0–18+6 | 0.25        | 0.97        | 0.06                      | 0.99                      | 0.22             |
| 19+0–23+6     | 0.25        | 0.97        | 0.09                      | 0.99                      | 0.22             |
| 24+0–28+6     | 0.30        | 0.96        | 0.34                      | 0.96                      | 0.26             |
| 29+0–33+6     | 0.13        | 0.98        | 0.34                      | 0.94                      | 0.11             |
| 34+0–38+6     | 0.10        | 0.97        | 0.23                      | 0.92                      | 0.07             |
| <b>FL/AC</b>  |             |             |                           |                           |                  |
| Total         | 1.00        | 0.01        | 0.03                      | 0.99                      | 0.01             |
| GA: 14+0–18+6 | 0.88        | 0.09        | 0.01                      | 0.99                      | -0.03            |
| 19+0–23+6     | 1.00        | 0.00        | 0.01                      | –                         | 0.00             |
| 24+0–28+6     | 1.00        | 0.00        | 0.06                      | –                         | 0.00             |
| 29+0–33+6     | 1.00        | 0.00        | 0.07                      | –                         | 0.00             |
| 34+0–38+6     | 1.00        | 0.00        | 0.09                      | –                         | 0.00             |

| TCD/AC        |  |      |      |      |      |       |
|---------------|--|------|------|------|------|-------|
| Total         |  | 0.30 | 0.97 | 0.24 | 0.98 | 0.27  |
| GA: 14+0-18+6 |  | 0.13 | 0.97 | 0.03 | 0.99 | 0.10  |
| 19+0-23+6     |  | 0.32 | 0.97 | 0.13 | 0.99 | 0.29  |
| 24+0-28+6     |  | 0.34 | 0.97 | 0.40 | 0.96 | 0.31  |
| 29+0-33+6     |  | 0.28 | 0.97 | 0.46 | 0.95 | 0.25  |
| 34+0-38+6     |  | 0.25 | 0.98 | 0.43 | 0.93 | 0.23  |
| HC/AC         |  |      |      |      |      |       |
| Total         |  | 0.13 | 0.99 | 0.25 | 0.97 | 0.12  |
| GA: 14+0-18+6 |  | 0.00 | 0.98 | 0.00 | 0.99 | -0.02 |
| 19+0-23+6     |  | 0.22 | 0.99 | 0.18 | 0.99 | 0.21  |
| 24+0-28+6     |  | 0.17 | 1.00 | 0.73 | 0.95 | 0.17  |
| 29+0-33+6     |  | 0.07 | 1.00 | 0.83 | 0.93 | 0.07  |
| 34+0-38+6     |  | 0.06 | 1.00 | 1.00 | 0.91 | 0.06  |
